# Supplementary material for: Binding Free Energy (BFE) Calculations and Quantitative Structure–Activity Relationship (QSAR) Analysis of Schistosoma mansoni Histone Deacetylase 8 (smHDAC8) Inhibitors
Source: MDPI journal article supplement (doi:10.3390/molecules26092584), 2021-04-28
Supplement: s1 [file s1]

Table SI\_1: Summary of redocking and crossed-docking rmsd between the atomic coordinates of the co-crystallized ligands pose and the docked pose based for the different *smHDAC8* crystalized proteins used in this study.

| PDB-ID.Chain | 4BZ6   | 4BZ7    | 4BZ8   | 4BZ9   | 4CQF   | 5FUE-   | 6FU1    | 6GX3   | 6GXA    | 6GXU   | 6GXW    | 6HQY   | 6HRQ   |
|--------------|--------|---------|--------|--------|--------|---------|---------|--------|---------|--------|---------|--------|--------|
| 4BZ7.A       | 9.332  | 4.3122  | 8.4564 | 6.2498 | 1.4452 | 10.5651 | 3.7347  | 9.237  | 4.5097  | 4.3047 | 11.6499 | 9.7755 | 4.1727 |
| 4BZ8.A       | 1.9422 | 2.6006  | 0.4615 | 2.842  | 2.6747 | 1.1467  | 2.7661  | 1.2743 | 2.7208  | 1.9431 | 1.8886  | 1.6547 | 1.2012 |
| 4BZ9.A       | 2.0847 | 2.0288  | 2.6946 | 0.3396 | 2.7801 | 2.1921  | 3.1253  | 1.8144 | 1.3388  | 2.1466 | 1.8798  | 2.2516 | 1.7569 |
| 4CQF.A       | 4.9007 | 4.1145  | 7.1393 | 2.883  | 6.9373 | 6.2036  | 4.3287  | 5.8476 | 4.2973  | 6.4933 | 5.8749  | 5.2396 | 5.4873 |
| 5FUE.C       | 2.1622 | 6.7069  | 4.0167 | 4.5767 | 2.3976 | 0.2285  | 5.38    | 0.8602 | 1.0938  | 0.6308 | 0.4061  | 1.3743 | 1.1051 |
| 6FU1.A       | 3.6687 | 4.3572  | 2.864  | 3.0835 | 2.2008 | 1.9365  | 3.0918  | 2.3943 | 1.9777  | 2.3025 | 2.1027  | 3.6532 | 1.2999 |
| 6GX3.A       | 0.5777 | 0.7548  | 0.835  | 1.9492 | 2.4252 | 0.3278  | 0.8507  | 0.2251 | 1.7416  | 0.8281 | 0.7766  | 0.8298 | 0.2711 |
| 6GXA.A       | 1.3769 | 2.234   | 1.7334 | 1.0604 | 2.3359 | 2.3426  | 2.4712  | 1.4553 | 0.4793  | 0.6372 | 2.0627  | 1.2037 | 1.5241 |
| 6GXU.A       | 1.3501 | 3.3411  | 3.8291 | 4.492  | 3.7483 | 1.1129  | 3.6936  | 1.6125 | 0.7961  | 0.4852 | 4.2575  | 0.5783 | 1.9285 |
| 6GXW.A       | 2.1889 | 2.4824  | 4.1894 | 4.7054 | 2.6549 | 2.3426  | 4.3176  | 0.9205 | 2.3324  | 2.6544 | 2.6926  | 1.9319 | 1.9171 |
| 6HQY.A       | 1.0926 | 2.589   | 2.0821 | 4.6798 | 3.2144 | 2.516   | 7.7507  | 3.0304 | 1.2488  | 1.1617 | 1.3191  | 1.0973 | 1.5272 |
| 6HRQ.A       | 3.5725 | 3.0107  | 3.1511 | 6.6396 | 3.237  | 3.7134  | 9.1757  | 1.1086 | 1.2374  | 3.7371 | 3.9295  | 3.5973 | 1.2334 |
| 6HSH.A       | 4.7782 | 5.9525  | 6.012  | 6.5674 | 7.3283 | 7.0334  | 5.9234  | 6.7578 | 5.9959  | 5.3594 | 7.0996  | 5.5554 | 6.9159 |
| 6HSZ.A       | 1.6523 | 1.7632  | 1.5933 | 4.7527 | 2.0691 | 0.4933  | 4.9007  | 1.0589 | 1.1799  | 0.838  | 0.4535  | 1.3768 | 0.7972 |
| 6HT8.A       | 1.4837 | 3.3922  | 3.2984 | 4.7837 | 2.0626 | 1.1378  | 4.8869  | 0.8283 | 1.2026  | 0.7567 | 1.1452  | 0.84   | 0.8562 |
| 6HTG.A       | 1.3729 | 1.5782  | 3.3922 | 4.7658 | 2.0342 | 0.6535  | 4.9101  | 1.2454 | 1.4802  | 0.6503 | 0.4209  | 1.656  | 0.7281 |
| 6HTH.A       | 2.0912 | 10.2397 | 5.7554 | 8.2105 | 9.7153 | 0.9478  | 10.2968 | 9.3249 | 10.2201 | 2.1194 | 1.3112  | 2.2352 | 1.3666 |
| 6HTI.A       | 0.8893 | 7.4348  | 5.2577 | 4.8621 | 1.8751 | 0.529   | 6.1181  | 1.0582 | 2.4365  | 2.1022 | 0.2775  | 2.1073 | 2.3637 |
| 6HTT.A       | 1.4622 | 1.3879  | 4.7083 | 4.5048 | 1.4894 | 0.9366  | 5.0682  | 0.7295 | 1.2387  | 1.2724 | 0.3749  | 0.9844 | 0.7058 |
| 6HTZ.A       | 1.7298 | 4.3216  | 0.8592 | 5.8732 | 1.64   | 2.1535  | 4.4801  | 1.8051 | 2.1218  | 1.6341 | 2.6759  | 1.979  | 2.0899 |
| 6HU0.A       | 2.075  | 1.3073  | 1.0971 | 4.7861 | 1.529  | 1.7382  | 1.5618  | 1.1484 | 1.4551  | 1.5764 | 0.1958  | 1.9665 | 0.7085 |
| 6HU1.A       | 2.102  | 6.7757  | 1.1067 | 4.7702 | 1.4049 | 0.3369  | 4.9664  | 1.3534 | 0.5683  | 1.5986 | 0.3296  | 2.0174 | 1.5453 |
| 6HU2.A       | 1.1195 | 5.9628  | 1.7928 | 3.7928 | 1.4959 | 1.1001  | 1.7313  | 1.6632 | 3.1334  | 1.6106 | 1.5749  | 1.489  | 1.5037 |
| 6HU3.A       | 1.6811 | 4.0606  | 1.676  | 5.7871 | 4.3484 | 1.1511  | 4.7526  | 2.122  | 1.2805  | 1.6576 | 2.1264  | 0.9933 | 1.6091 |

Table SI\_1 continues:

| PDB-ID.Chain | 6HSF   | 6HSG    | 6HSH   | 6HSZ   | 6HT8   | 6HTG   | 6HTH   | 6HTI    | 6HTT    | 6HTZ   | 6HU0   | 6HU1   | 6HU2   | 6HU3   |
|--------------|--------|---------|--------|--------|--------|--------|--------|---------|---------|--------|--------|--------|--------|--------|
| 4BZ7.A       | 4.3259 | 11.7683 | 8.5947 | 4.542  | 7.0551 | 7.2655 | 8.5568 | 11.4642 | 11.9157 | 7.2795 | 8.6283 | 6.9584 | 6.6607 | 9.0698 |
| 4BZ8.A       | 2.3995 | 2.5231  | 0.4889 | 1.2148 | 1.2483 | 1.1465 | 1.2112 | 0.9469  | 1.5686  | 0.9471 | 0.8695 | 1.4058 | 1.3091 | 1.2325 |
| 4BZ9.A       | 1.7223 | 1.9405  | 2.6786 | 1.6724 | 1.6868 | 1.6681 | 1.5903 | 1.7097  | 1.7625  | 1.5835 | 2.2557 | 1.7022 | 1.7505 | 1.7573 |
| 4CQF.A       | 4.7954 | 6.0275  | 7.2997 | 6.1045 | 5.7546 | 5.8918 | 5.9252 | 5.9031  | 6.4936  | 6.0347 | 6.0145 | 6.1087 | 3.2012 | 6.0738 |
| 5FUE.C       | 1.098  | 1.4228  | 3.776  | 1.2374 | 1.1966 | 0.7651 | 1.1542 | 1.1541  | 0.9666  | 0.6276 | 0.5128 | 1.1433 | 0.334  | 1.745  |
| 6FU1.A       | 3.4126 | 1.4356  | 2.8504 | 3.3438 | 3.1604 | 3.5533 | 3.493  | 3.4472  | 1.612   | 3.3221 | 3.3627 | 3.4544 | 4.2121 | 3.8013 |
| 6GX3.A       | 0.5179 | 0.2629  | 2.4233 | 0.314  | 0.4391 | 0.3678 | 0.258  | 0.2309  | 0.4224  | 0.486  | 0.3187 | 0.4229 | 0.3873 | 0.2472 |
| 6GXA.A       | 0.4841 | 1.5584  | 2.4351 | 1.2183 | 1.3081 | 1.236  | 1.4895 | 1.4687  | 1.5669  | 1.2311 | 1.4541 | 1.3298 | 2.1755 | 1.4392 |
| 6GXU.A       | 1.0603 | 1.879   | 4.0798 | 1.1255 | 0.8696 | 1.0953 | 0.9033 | 1.0742  | 1.6149  | 1.0982 | 1.616  | 0.9457 | 0.9246 | 1.7186 |
| 6GXW.A       | 2.1414 | 2.4673  | 4.3247 | 2.2055 | 2.6379 | 2.6369 | 1.9889 | 2.5127  | 2.234   | 1.8033 | 2.5228 | 1.9491 | 2.6938 | 0.9207 |
| 6HQY.A       | 0.4563 | 2.6082  | 3.5936 | 1.2731 | 1.2478 | 1.2364 | 1.2251 | 0.8772  | 1.4845  | 0.6936 | 1.4132 | 1.2287 | 2.7205 | 2.879  |
| 6HRQ.A       | 2.9867 | 3.6883  | 3.1347 | 3.5488 | 3.6454 | 3.6861 | 3.7329 | 3.7964  | 3.7322  | 3.6766 | 1.0958 | 3.6857 | 3.7021 | 4.2912 |
| 6HSH.A       | 5.2334 | 3.7783  | 2.1169 | 5.0552 | 6.791  | 6.7121 | 6.8086 | 5.264   | 4.8627  | 6.0086 | 6.6144 | 5.3291 | 6.7415 | 5.8004 |
| 6HSZ.A       | 1.0275 | 1.4203  | 3.5569 | 0.2039 | 1.1557 | 0.4074 | 0.2448 | 0.1853  | 0.4433  | 0.3608 | 0.3503 | 1.1081 | 1.1028 | 0.3914 |
| 6HT8.A       | 1.1606 | 1.1082  | 3.3789 | 1.1087 | 0.3455 | 1.1005 | 0.2833 | 0.2418  | 0.9039  | 1.108  | 1.1226 | 0.2873 | 0.4163 | 1.0896 |
| 6HTG.A       | 1.343  | 1.4882  | 3.6202 | 0.5683 | 1.2034 | 1.3065 | 1.2207 | 1.1936  | 0.8411  | 0.6426 | 0.6158 | 0.6038 | 0.5835 | 1.1637 |
| 6HTH.A       | 1.431  | 1.5726  | 6.2781 | 1.2579 | 0.872  | 0.8991 | 1.2599 | 0.94    | 1.2859  | 1.2451 | 0.4833 | 0.8708 | 0.9802 | 1.4562 |
| 6HTI.A       | 1.8805 | 1.0324  | 1.7887 | 2.3245 | 2.3616 | 0.5084 | 2.1992 | 0.2136  | 0.2198  | 2.3161 | 0.4989 | 2.3152 | 0.3807 | 0.3011 |
| 6HTT.A       | 1.2791 | 0.7953  | 4.9248 | 1.234  | 1.2087 | 0.6695 | 1.2256 | 0.7739  | 1.114   | 1.2942 | 0.4459 | 1.232  | 1.1775 | 0.7149 |
| 6HTZ.A       | 1.8456 | 1.775   | 1.7363 | 1.0981 | 1.2377 | 0.8571 | 0.8534 | 0.7563  | 1.4654  | 1.3305 | 0.7963 | 1.6517 | 1.7004 | 1.2219 |
| 6HU0.A       | 1.6417 | 0.9399  | 2.8095 | 1.5929 | 0.3368 | 0.4675 | 1.5395 | 0.2074  | 1.6905  | 1.587  | 1.5895 | 0.2689 | 0.2541 | 0.6136 |
| 6HU1.A       | 1.94   | 1.0048  | 3.4199 | 1.6207 | 1.5903 | 0.4473 | 0.2553 | 0.2101  | 1.5318  | 1.6397 | 0.3958 | 0.2116 | 0.3659 | 1.1334 |
| 6HU2.A       | 1.7851 | 1.4728  | 1.6978 | 1.4639 | 1.4345 | 1.6859 | 1.219  | 1.5269  | 1.1034  | 1.4226 | 0.9396 | 1.7415 | 1.9088 | 2.7986 |
| 6HU3.A       | 2.5645 | 0.6011  | 4.9322 | 1.3152 | 1.178  | 1.3191 | 1.9757 | 0.9486  | 4.9418  | 0.9405 | 1.1937 | 1.2948 | 1.1364 | 1.606  |

The colour shadings from dark green through light green, yellow, light red to thick red shows how well the co-crystallized ligand coordinates were reproduced to how poor they were redocked respectively.

Table SI\_2: Summary of generated models. (Terms are described after the table)

| Model_Number | Model-composition                         | Im        | LOOCV |           | leave_3out CV |           | 3fold CV |           | Presence of 2D-Descriptor | Outlier |
|--------------|-------------------------------------------|-----------|-------|-----------|---------------|-----------|----------|-----------|---------------------------|---------|
|              |                                           | R-squared | RMSE  | Q-squared | QMSE          | Q-squared | QMSE     | Q-squared | QMSE                      |         |
| 1            | docking_score                             | 0.01      | 0.44  | 0.53      | 0.52          | -         | -        | -         | -                         | -       |
| 2            | AM1/GB1_Emin3_1Des                        | 0.17      | 0.40  | 0.05      | 0.44          | -         | -        | -         | -                         | -       |
| 3            | AM1/GB1_Emin3_3Des                        | 0.26      | 0.38  | 0.08      | 0.43          | -         | -        | -         | -                         | -       |
| 4            | AM1/GB1_Emin1_1Des                        | 0.26      | 0.38  | 0.15      | 0.41          | -         | -        | -         | -                         | -       |
| 5            | AM1/GB1_Emin1_3Des                        | 0.28      | 0.37  | 0.07      | 0.47          | -         | -        | -         | -                         | -       |
| 6            | AM1/GB1_Emin2_1Des                        | 0.41      | 0.34  | 0.30      | 0.37          | -         | -        | -         | -                         | -       |
| 7            | AM1/GB1_Emin2_1Des                        | 0.51      | 0.31  | 0.38      | 0.35          | -         | -        | -         | -                         | YES     |
| 8            | AM1/GB1_Emin2_3Des                        | 0.44      | 0.33  | 0.25      | 0.39          | -         | -        | -         | -                         | -       |
| 9            | AM1/GB1_Emin2_3Des                        | 0.44      | 0.33  | 0.25      | 0.39          | -         | -        | -         | -                         | YES     |
| 10           | AM1/GB1_MD101to500_1Des                   | 0.27      | 0.38  | 0.15      | 0.41          | -         | -        | -         | -                         | -       |
| 11           | AM1/GB1_MD101to500_3Des                   | 0.29      | 0.37  | 0.13      | 0.42          | -         | -        | -         | -                         | -       |
| 12           | AM1/GB1_MD1to50_1Des                      | 0.21      | 0.39  | 0.10      | 0.42          | -         | -        | -         | -                         | -       |
| 13           | AM1/GB1_MD1to50_3Des                      | 0.30      | 0.37  | 0.13      | 0.42          | -         | -        | -         | -                         | -       |
| 14           | AM1/GB1_MD1to50_3Des                      | 0.30      | 0.37  | 0.13      | 0.42          | -         | -        | -         | -                         | YES     |
| 15           | AM1/GB1_MD51to100_1Des                    | 0.18      | 0.40  | 0.08      | 0.43          | -         | -        | -         | -                         | -       |
| 16           | AM1/GB1_MD51to100_3Des                    | 0.26      | 0.38  | 0.11      | 0.42          | -         | -        | -         | -                         | -       |
| 17           | GB <sup>HCT</sup> (igb=1)_Emin3_1Des      | 0.02      | 0.44  | 0.08      | 0.47          | -         | -        | -         | -                         | -       |
| 18           | GB <sup>HCT</sup> (igb=1)_Emin3_2Des      | 0.06      | 0.43  | 0.02      | 0.47          | -         | -        | -         | -                         | -       |
| 19           | GB <sup>HCT</sup> (igb=1)_Emin1_1Des      | 0.27      | 0.38  | 0.14      | 0.41          | -         | -        | -         | -                         | -       |
| 20           | GB <sup>HCT</sup> (igb=1)_Emin1_2Des      | 0.29      | 0.37  | 0.14      | 0.42          | -         | -        | -         | -                         | -       |
| 21           | GB <sup>HCT</sup> (igb=1)_Emin2_1Des      | 0.27      | 0.38  | 0.13      | 0.42          | -         | -        | -         | -                         | -       |
| 22           | GB <sup>HCT</sup> (igb=1)_Emin2_2Des      | 0.31      | 0.37  | 0.13      | 0.42          | -         | -        | -         | -                         | -       |
| 23           | GB <sup>HCT</sup> (igb=1)_Emin2_2Des      | 0.51      | 0.31  | 0.32      | 0.36          | -         | -        | -         | -                         | YES     |
| 24           | GB <sup>HCT</sup> (igb=1)_MD101to500_1Des | 0.15      | 0.41  | 0.03      | 0.45          | -         | -        | -         | -                         | -       |
| 25           | GB <sup>HCT</sup> (igb=1)_MD101to500_2Des | 0.17      | 0.40  | 0.02      | 0.45          | -         | -        | -         | -                         | -       |
| 26           | GB <sup>HCT</sup> (igb=1)_MD1to50_1Des    | 0.14      | 0.41  | 0.03      | 0.44          | -         | -        | -         | -                         | -       |
| 27           | GB <sup>HCT</sup> (igb=1)_MD1to50_2Des    | 0.19      | 0.40  | 0.05      | 0.44          | -         | -        | -         | -                         | -       |

|    |                                            |      |      |      |      |   |   |   |   |     |
|----|--------------------------------------------|------|------|------|------|---|---|---|---|-----|
| 28 | GB <sup>HCT</sup> (igb=1)_MD1to50_4Des     | 0.28 | 0.38 | 0.04 | 0.48 | - | - | - | - | -   |
| 29 | GB <sup>HCT</sup> (igb=1)_MD51to100_1Des   | 0.13 | 0.41 | 0.02 | 0.45 | - | - | - | - | -   |
| 30 | GB <sup>HCT</sup> (igb=1)_MD51to100_2Des   | 0.16 | 0.40 | 0.04 | 0.44 | - | - | - | - | -   |
| 31 | GB <sup>OBC</sup> (igb=2)_Emin3_1Des       | 0.21 | 0.39 | 0.11 | 0.42 | - | - | - | - | -   |
| 32 | GB <sup>OBC</sup> (igb=2)_Emin3_2Des       | 0.21 | 0.39 | 0.06 | 0.44 | - | - | - | - | -   |
| 33 | GB <sup>OBC</sup> (igb=2)_Emin1_1Des       | 0.30 | 0.37 | 0.19 | 0.40 | - | - | - | - | -   |
| 34 | GB <sup>OBC</sup> (igb=2)_Emin1_1Des       | 0.46 | 0.32 | 0.33 | 0.36 | - | - | - | - | YES |
| 35 | GB <sup>OBC</sup> (igb=2)_Emin1_2Des       | 0.31 | 0.37 | 0.17 | 0.41 | - | - | - | - | -   |
| 36 | GB <sup>OBC</sup> (igb=2)_Emin1_2Des       | 0.31 | 0.37 | 0.17 | 0.41 | - | - | - | - | YES |
| 37 | GB <sup>OBC</sup> (igb=2)_Emin2_1Des       | 0.22 | 0.39 | 0.09 | 0.43 | - | - | - | - | -   |
| 38 | GB <sup>OBC</sup> (igb=2)_Emin2_2Des       | 0.22 | 0.39 | 0.07 | 0.44 | - | - | - | - | -   |
| 39 | GB <sup>OBC</sup> (igb=2)_MD101to500_1Des  | 0.17 | 0.40 | 0.07 | 0.43 | - | - | - | - | -   |
| 40 | GB <sup>OBC</sup> (igb=2)_MD101to500_2Des  | 0.18 | 0.40 | 0.05 | 0.44 | - | - | - | - | -   |
| 41 | GB <sup>OBC</sup> (igb=2)_MD1to50_1Des     | 0.10 | 0.42 | 0.02 | 0.45 | - | - | - | - | -   |
| 42 | GB <sup>OBC</sup> (igb=2)_MD1to50_2Des     | 0.14 | 0.41 | 0.02 | 0.45 | - | - | - | - | -   |
| 43 | GB <sup>OBC</sup> (igb=2)_MD1to50_4Des     | 0.22 | 0.39 | 0.03 | 0.45 | - | - | - | - | -   |
| 44 | GB <sup>OBC</sup> (igb=2)_MD51to100_1Des   | 0.17 | 0.40 | 0.04 | 0.44 | - | - | - | - | -   |
| 45 | GB <sup>OBC</sup> (igb=2)_MD51to100_2Des   | 0.17 | 0.40 | 0.03 | 0.45 | - | - | - | - | -   |
| 46 | GB <sup>OBC2</sup> (igb=5)_Emin3_1Des      | 0.20 | 0.39 | 0.10 | 0.42 | - | - | - | - | -   |
| 47 | GB <sup>OBC2</sup> (igb=5)_Emin3_2Des      | 0.20 | 0.39 | 0.05 | 0.44 | - | - | - | - | -   |
| 48 | GB <sup>OBC2</sup> (igb=5)_Emin1_1Des      | 0.31 | 0.36 | 0.20 | 0.40 | - | - | - | - | -   |
| 49 | GB <sup>OBC2</sup> (igb=5)_Emin1_1Des      | 0.47 | 0.32 | 0.34 | 0.36 | - | - | - | - | YES |
| 50 | GB <sup>OBC2</sup> (igb=5)_Emin1_2Des      | 0.34 | 0.36 | 0.19 | 0.40 | - | - | - | - | -   |
| 51 | GB <sup>OBC2</sup> (igb=5)_Emin1_2Des      | 0.34 | 0.36 | 0.19 | 0.40 | - | - | - | - | YES |
| 52 | GB <sup>OBC2</sup> (igb=5)_Emin2_1Des      | 0.19 | 0.40 | 0.06 | 0.44 | - | - | - | - | -   |
| 53 | GB <sup>OBC2</sup> (igb=5)_Emin2_2Des      | 0.19 | 0.40 | 0.05 | 0.44 | - | - | - | - | -   |
| 54 | GB <sup>OBC2</sup> (igb=5)_MD101to500_1Des | 0.15 | 0.41 | 0.05 | 0.43 | - | - | - | - | -   |
| 55 | GB <sup>OBC2</sup> (igb=5)_MD101to500_2Des | 0.17 | 0.40 | 0.04 | 0.44 | - | - | - | - | -   |
| 56 | GB <sup>OBC2</sup> (igb=5)_MD1to50_1Des    | 0.08 | 0.42 | 0.01 | 0.45 | - | - | - | - | -   |
| 57 | GB <sup>OBC2</sup> (igb=5)_MD1to50_2Des    | 0.13 | 0.41 | 0.02 | 0.45 | - | - | - | - | -   |
| 58 | GB <sup>OBC2</sup> (igb=5)_MD51to100_1Des  | 0.15 | 0.41 | 0.03 | 0.45 | - | - | - | - | -   |

|    |                                           |      |      |      |      |   |   |   |   |   |
|----|-------------------------------------------|------|------|------|------|---|---|---|---|---|
| 59 | GB <sup>OBC2</sup> (igb=5)_MD51to100_2Des | 0.15 | 0.41 | 0.01 | 0.45 | - | - | - | - | - |
| 60 | GBn (igb=8)_Emin3_1Des                    | 0.05 | 0.43 | 0.00 | 0.46 | - | - | - | - | - |
| 61 | GBn (igb=8)_Emin3_2Des                    | 0.07 | 0.42 | 0.00 | 0.46 | - | - | - | - | - |
| 62 | GBn (igb=8)_Emin1_1Des                    | 0.01 | 0.44 | 0.14 | 0.46 | - | - | - | - | - |
| 63 | GBn (igb=8)_Emin1_2Des                    | 0.07 | 0.43 | 0.00 | 0.46 | - | - | - | - | - |
| 64 | GBn (igb=8)_Emin2_1Des                    | 0.02 | 0.44 | 0.03 | 0.46 | - | - | - | - | - |
| 65 | GBn (igb=8)_Emin2_2Des                    | 0.19 | 0.40 | 0.02 | 0.48 | - | - | - | - | - |
| 66 | GBn (igb=8)_MD101to500_1Des               | 0.04 | 0.43 | 0.04 | 0.47 | - | - | - | - | - |
| 67 | GBn (igb=8)_MD101to500_2Des               | 0.07 | 0.43 | 0.01 | 0.47 | - | - | - | - | - |
| 68 | GBn (igb=8)_MD1to50_1Des                  | 0.12 | 0.41 | 0.03 | 0.44 | - | - | - | - | - |
| 69 | GBn (igb=8)_MD1to50_2Des                  | 0.17 | 0.40 | 0.05 | 0.44 | - | - | - | - | - |
| 70 | GBn (igb=8)_MD51to100_1Des                | 0.15 | 0.41 | 0.05 | 0.44 | - | - | - | - | - |
| 71 | GBn (igb=8)_MD51to100_2Des                | 0.19 | 0.40 | 0.06 | 0.44 | - | - | - | - | - |
| 72 | PB_mbondi_Emin3_1Des                      | 0.01 | 0.44 | 0.27 | 0.47 | - | - | - | - | - |
| 73 | PB_mbondi_Emin3_2Des                      | 0.01 | 0.44 | 0.41 | 0.48 | - | - | - | - | - |
| 74 | PB_mbondi_Emin1_1Des                      | 0.16 | 0.40 | 0.04 | 0.44 | - | - | - | - | - |
| 75 | PB_mbondi_Emin1_2Des                      | 0.19 | 0.40 | 0.04 | 0.45 | - | - | - | - | - |
| 76 | PB_mbondi_Emin2_1Des                      | 0.23 | 0.39 | 0.09 | 0.43 | - | - | - | - | - |
| 77 | PB_mbondi_Emin2_2Des                      | 0.27 | 0.38 | 0.08 | 0.43 | - | - | - | - | - |
| 78 | PB_mbondi_MD101to500_1Des                 | 0.07 | 0.42 | 0.00 | 0.47 | - | - | - | - | - |
| 79 | PB_mbondi_MD101to500_2Des                 | 0.12 | 0.41 | 0.00 | 0.48 | - | - | - | - | - |
| 80 | PB_mbondi_MD1to50_1Des                    | 0.07 | 0.43 | 0.00 | 0.46 | - | - | - | - | - |
| 81 | PB_mbondi_MD1to50_2Des                    | 0.11 | 0.42 | 0.00 | 0.46 | - | - | - | - | - |
| 82 | PB_mbondi_MD51to100_1Des                  | 0.02 | 0.44 | 0.05 | 0.47 | - | - | - | - | - |
| 83 | PB_mbondi_MD51to100_2Des                  | 0.02 | 0.44 | 0.13 | 0.49 | - | - | - | - | - |
| 84 | PB_bondi_Emin3_1Des                       | 0.19 | 0.40 | 0.09 | 0.42 | - | - | - | - | - |
| 85 | PB_bondi_Emin3_2Des                       | 0.20 | 0.39 | 0.05 | 0.44 | - | - | - | - | - |
| 86 | PB_bondi_Emin1_1Des                       | 0.15 | 0.41 | 0.03 | 0.44 | - | - | - | - | - |
| 87 | PB_bondi_Emin1_2Des                       | 0.17 | 0.40 | 0.02 | 0.45 | - | - | - | - | - |
| 88 | PB_bondi_Emin2_1Des                       | 0.20 | 0.39 | 0.07 | 0.43 | - | - | - | - | - |
| 89 | PB_bondi_Emin2_2Des                       | 0.21 | 0.39 | 0.03 | 0.45 | - | - | - | - | - |

|     |                          |      |      |      |      |      |      |      |      |     |                        |
|-----|--------------------------|------|------|------|------|------|------|------|------|-----|------------------------|
| 90  | PB_bondi_MD101to500_1Des | 0.22 | 0.39 | 0.11 | 0.42 | -    | -    | -    | -    | -   |                        |
| 91  | PB_bondi_MD101to500_2Des | 0.24 | 0.39 | 0.07 | 0.44 | -    | -    | -    | -    | -   |                        |
| 92  | PB_bondi_MD1to50_1Des    | 0.29 | 0.37 | 0.19 | 0.40 | -    | -    | -    | -    | -   |                        |
| 93  | PB_bondi_MD1to50_2Des    | 0.29 | 0.37 | 0.16 | 0.41 | -    | -    | -    | -    | -   |                        |
| 94  | PB_bondi_MD51to100_1Des  | 0.45 | 0.33 | 0.36 | 0.35 | 0.39 | 0.36 | 0.38 | 0.36 | -   |                        |
| 95  | PB_bondi_MD51to100_1Des  | 0.61 | 0.27 | 0.53 | 0.30 | 0.55 | 0.30 | 0.54 | 0.31 | YES |                        |
| 96  | PB_bondi_MD51to100_1Des  | 0.62 | 0.22 | 0.53 | 0.25 | 0.56 | 0.25 | 0.54 | 0.26 | YES | TH58                   |
| 97  | PB_bondi_MD51to100_1Des  | 0.73 | 0.19 | 0.66 | 0.22 | 0.70 | 0.21 | 0.69 | 0.22 | YES | TH58,<br>TH70,<br>TH74 |
| 98  | PB_bondi_MD51to100_2Des  | 0.46 | 0.32 | 0.32 | 0.37 | -    | -    | -    | -    | -   |                        |
| 99  | PB_bondi_MD51to100_2Des  | 0.46 | 0.32 | 0.32 | 0.37 | -    | -    | -    | -    | YES |                        |
| 100 | PB_PARSE_Emin3_1Des      | 0.08 | 0.42 | 0.01 | 0.45 | -    | -    | -    | -    | -   |                        |
| 101 | PB_PARSE_Emin3_2Des      | 0.09 | 0.42 | 0.00 | 0.47 | -    | -    | -    | -    | -   |                        |
| 102 | PB_PARSE_Emin1_1Des      | 0.12 | 0.41 | 0.02 | 0.45 | -    | -    | -    | -    | -   |                        |
| 103 | PB_PARSE_Emin1_2Des      | 0.13 | 0.41 | 0.00 | 0.46 | -    | -    | -    | -    | -   |                        |
| 104 | PB_PARSE_Emin2_1Des      | 0.17 | 0.40 | 0.05 | 0.44 | -    | -    | -    | -    | -   |                        |
| 105 | PB_PARSE_Emin2_2Des      | 0.17 | 0.40 | 0.01 | 0.46 | -    | -    | -    | -    | -   |                        |
| 106 | PB_PARSE_MD101to500_1Des | 0.12 | 0.41 | 0.03 | 0.44 | -    | -    | -    | -    | -   |                        |
| 107 | PB_PARSE_MD101to500_2Des | 0.12 | 0.41 | 0.01 | 0.46 | -    | -    | -    | -    | -   |                        |
| 108 | PB_PARSE_MD1to50_1Des    | 0.02 | 0.44 | 0.02 | 0.45 | -    | -    | -    | -    | -   |                        |
| 109 | PB_PARSE_MD1to50_2Des    | 0.06 | 0.43 | 0.00 | 0.46 | -    | -    | -    | -    | -   |                        |
| 110 | PB_PARSE_MD51to100_1Des  | 0.05 | 0.43 | 0.00 | 0.45 | -    | -    | -    | -    | -   |                        |
| 111 | PB_PARSE_MD51to100_2Des  | 0.06 | 0.43 | 0.00 | 0.46 | -    | -    | -    | -    | -   |                        |
| 112 | PM3/GB1_Emin3_1Des       | 0.06 | 0.43 | 0.01 | 0.55 | -    | -    | -    | -    | -   |                        |
| 113 | PM3/GB1_Emin3_3Des       | 0.14 | 0.41 | 0.02 | 0.51 | -    | -    | -    | -    | -   |                        |
| 114 | PM3/GB1_Emin1_1Des       | 0.23 | 0.39 | 0.13 | 0.41 | -    | -    | -    | -    | -   |                        |
| 115 | PM3/GB1_Emin1_3Des       | 0.31 | 0.37 | 0.13 | 0.43 | -    | -    | -    | -    | -   |                        |
| 116 | PM3/GB1_Emin1_3Des       | 0.31 | 0.37 | 0.13 | 0.43 | -    | -    | -    | -    | YES |                        |
| 117 | PM3/GB1_Emin2_1Des       | 0.37 | 0.35 | 0.26 | 0.38 | -    | -    | -    | -    | -   |                        |
| 118 | PM3/GB1_Emin2_1Des       | 0.52 | 0.31 | 0.41 | 0.34 | -    | -    | -    | -    | YES |                        |

|            |                         |      |      |      |      |   |   |   |   |     |
|------------|-------------------------|------|------|------|------|---|---|---|---|-----|
| <b>119</b> | PM3/GB1_Emin2_3Des      | 0.42 | 0.34 | 0.25 | 0.39 | - | - | - | - | -   |
| <b>120</b> | PM3/GB1_Emin2_3Des      | 0.42 | 0.34 | 0.26 | 0.38 | - | - | - | - | YES |
| <b>121</b> | PM3/GB1_MD101to500_1Des | 0.20 | 0.40 | 0.08 | 0.43 | - | - | - | - | -   |
| <b>122</b> | PM3/GB1_MD101to500_3Des | 0.20 | 0.39 | 0.03 | 0.45 | - | - | - | - | -   |
| <b>123</b> | PM3/GB1_MD1to50_1Des    | 0.14 | 0.41 | 0.05 | 0.44 | - | - | - | - | -   |
| <b>124</b> | PM3/GB1_MD1to50_3Des    | 0.22 | 0.39 | 0.03 | 0.46 | - | - | - | - | -   |
| <b>125</b> | PM3/GB1_MD51to100_1Des  | 0.12 | 0.41 | 0.04 | 0.44 | - | - | - | - | -   |
| <b>126</b> | PM3/GB1_MD51to100_3Des  | 0.16 | 0.40 | 0.01 | 0.47 | - | - | - | - | -   |

**lm**: linear model, **LOOCV**: Leave-one out cross validation, **Leave\_3out CV**: Leave-3-out cross validation, **3fold CV**: 3fold cross validation, **PM3/GB1**:

Parameterized Model number 3 in combination with GB1 solvation, **AM1/GB1**: Austin Model 1 in combination with GB1 solvation, **Emin3**: Single frame after the third energy minimization step, **Emin2**: Single frame after the second energy minimization step, **Emin1**: Single frame after the first energy minimization step, **MD1-50**: Every fifth frame from the first frame for 1 – 50 during the MD simulation run, **MD51-100**: Every fifth frame from the first frame for 51 – 100 during the MD simulation run. **MD101-500**: Every fifth frame from the first frame for 101 – 500 during the MD simulation run. **3Des**: the three energy terms summing up to the final energy (deltaG\_gas, deltaG\_sol and ESCF), **2Des**: the two energy terms summing up to the final energy (deltaG\_gas and deltaG\_sol), **1Des**: the final energy (deltaG)

Table\_SI-3: summary of prediction results based on *Models 95* and *96*.

| Compound Number | Name         | smHDAC8<br>_nM-IC <sub>50</sub> | pIC <sub>50</sub><br>_exp | \$PRED_<br>Model_95 | Residual<br>Model_95 | \$PRED_<br>Model_96 | Residual<br>Model_96 | GlideSP<br>_DS |
|-----------------|--------------|---------------------------------|---------------------------|---------------------|----------------------|---------------------|----------------------|----------------|
| <b>1</b>        | <b>AT_T4</b> | 163 ± 17                        | 6.79                      | 7.03                | -0.24                | 6.96                | -0.17                | -9.20          |
| <b>2</b>        | <b>SD14</b>  | 197 ± 19                        | 6.71                      | 6.73                | -0.02                | 6.70                | 0.01                 | -9.24          |
| <b>3</b>        | <b>TH112</b> | 103 ± 7                         | 6.99                      | 6.91                | 0.07                 | 6.87                | 0.12                 | -8.99          |
| <b>4</b>        | <b>TH117</b> | 404 ± 90                        | 6.39                      | 6.48                | -0.09                | 6.51                | -0.12                | -8.69          |
| <b>5</b>        | <b>TH119</b> | 101 ± 7                         | 6.99                      | 6.67                | 0.32                 | 6.66                | 0.33                 | -8.47          |
| <b>6</b>        | <b>TH120</b> | 97 ± 16                         | 7.01                      | 6.96                | 0.05                 | 6.92                | 0.09                 | -8.90          |
| <b>7</b>        | <b>TH125</b> | 575 ± 72                        | 6.24                      | 6.84                | -0.60                | 6.82                | -0.58                | -9.48          |
| <b>8</b>        | <b>TH127</b> | 605 ± 68                        | 6.22                      | 7.02                | -0.81                | 6.94                | -0.72                | -9.23          |
| <b>9</b>        | <b>TH128</b> | 447 ± 31                        | 6.35                      | 6.82                | -0.47                | 6.78                | -0.43                | -8.63          |
| <b>10</b>       | <b>TH132</b> | 101 ± 77                        | 7.00                      | 6.64                | 0.36                 | 6.63                | 0.37                 | -8.71          |
| <b>11</b>       | <b>TH133</b> | 112 ± 11                        | 6.95                      | 6.87                | 0.08                 | 6.82                | 0.13                 | -8.35          |
| <b>12</b>       | <b>TH134</b> | 729 ± 86                        | 6.14                      | 6.22                | -0.08                | 6.30                | -0.16                | -8.51          |
| <b>13</b>       | <b>TH135</b> | 725 ± 52                        | 6.14                      | 6.96                | -0.82                | 6.90                | -0.76                | -8.76          |
| <b>14</b>       | <b>TH136</b> | 2078 ± 273                      | 5.68                      | 6.88                | -1.19                | 6.83                | -1.15                | -9.29          |
| <b>15</b>       | <b>TH137</b> | 220 ± 13                        | 6.66                      | 6.38                | 0.28                 | 6.44                | 0.22                 | -9.22          |
| <b>16</b>       | <b>TH138</b> | 318 ± 19                        | 6.50                      | 6.44                | 0.06                 | 6.47                | 0.03                 | -8.99          |
| <b>17</b>       | <b>TH139</b> | 281 ± 37                        | 6.55                      | 6.82                | -0.27                | 6.78                | -0.23                | -8.66          |
| <b>18</b>       | <b>TH142</b> | 332 ± 51                        | 6.48                      | 7.09                | -0.61                | 7.01                | -0.53                | -9.84          |
| <b>19</b>       | <b>TH143</b> | 271 ± 30                        | 6.57                      | 6.99                | -0.42                | 6.92                | -0.36                | -9.76          |
| <b>20</b>       | <b>TH156</b> | 451 ± 90                        | 6.35                      | 5.98                | 0.37                 | 6.04                | 0.30                 | -9.42          |
| <b>21</b>       | <b>TH34</b>  | 1260 ± 170                      | 5.90                      | 6.27                | -0.37                | 6.30                | -0.40                | -9.15          |
| <b>22</b>       | <b>TH42</b>  | 620 ± 0                         | 6.21                      | 6.35                | -0.14                | 6.36                | -0.15                | -9.74          |
| <b>23</b>       | <b>TH97</b>  | 220 ± 67                        | 6.66                      | 6.71                | -0.05                | 6.74                | -0.09                | -8.13          |
| <b>24</b>       | <b>TH98</b>  | 1590 ± 190                      | 5.80                      | 6.32                | -0.52                | 6.38                | -0.59                | -9.59          |
